# Supplementary material for: A Comparative Study of Cerium(III) and Cerium(IV) Phosphates for Sunscreens
Source: MDPI journal article supplement (doi:10.3390/molecules29092157), 2024-05-06
Supplement: s1 [file s1]

## Supplementary Materials

# A Comparative Study of Cerium(III) and Cerium(IV) Phosphates for Sunscreens

Taisiya O. Kozlova <sup>1</sup>, Darya N. Vasilyeva <sup>1,2</sup>, Daniil A. Kozlov <sup>1</sup>, Irina V. Kolesnik <sup>1,3</sup>,  
Maria A. Teplonogova <sup>1</sup>, Ilya V. Tronev <sup>1,2</sup>, Ekaterina D. Sheichenko <sup>1,2</sup>, Maria R. Protsenko <sup>1,2</sup>,  
Danil D. Kolmanovich <sup>4</sup>, Olga S. Ivanova <sup>5</sup>, Alexander E. Baranchikov <sup>1</sup> and Vladimir K. Ivanov <sup>1,\*</sup>

<sup>1</sup> Kurnakov Institute of General and Inorganic Chemistry, Russian Academy of Sciences, Moscow 119991, Russia

<sup>2</sup> Faculty of Chemistry, National Research University Higher School of Economics, Moscow 101000, Russia

<sup>3</sup> Faculty of Materials Science, Lomonosov Moscow State University, Moscow 119991, Russia

<sup>4</sup> Institute of Theoretical and Experimental Biophysics, Russian Academy of Sciences, Pushchino 142290, Russia

<sup>5</sup> Frumkin Institute of Physical Chemistry and Electrochemistry, Russian Academy of Sciences, Moscow 119071, Russia

\* Correspondence: van@igic.ras.ru

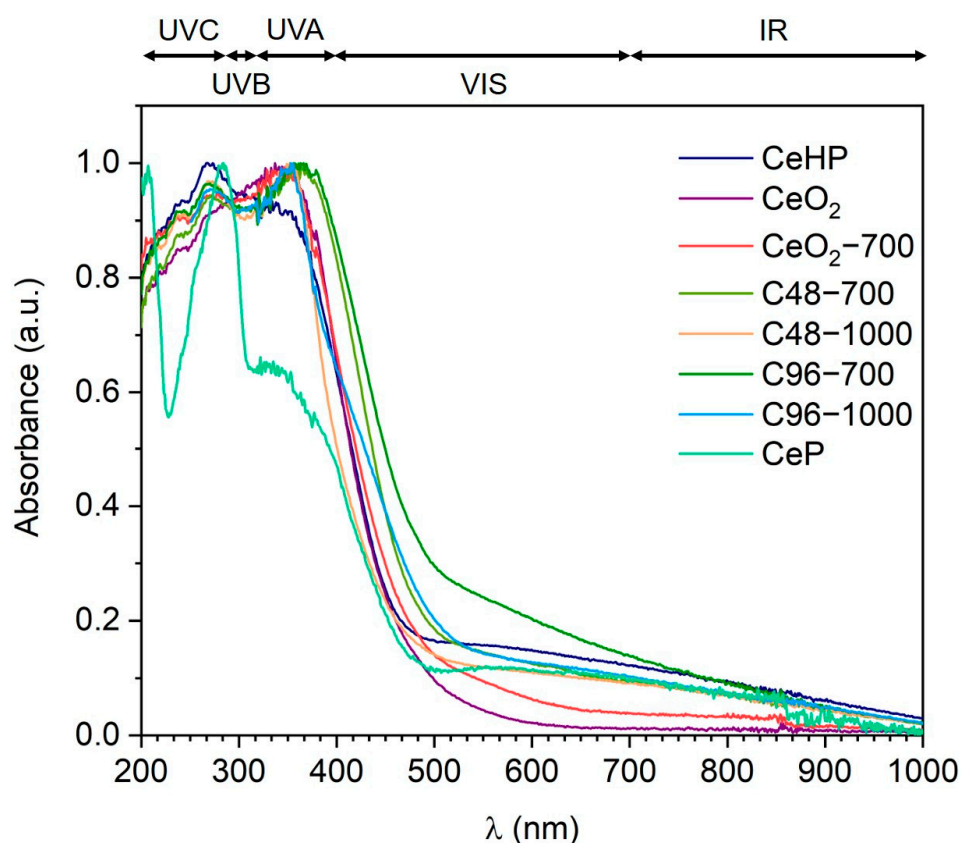

**Figure S1.** Normalised UV-vis absorption spectra of ceria, cerium phosphates and CePO<sub>4</sub>/CeO<sub>2</sub> composites.

**Table S1.** EDX data for the cerium phosphate/ceria composites.

| Sample     | C48-700 | C48-1000 | C96-700 | C96-1000 |
|------------|---------|----------|---------|----------|
| Ce:P ratio | 7.8±2.6 | 8.6±2.6  | 7.0±1.0 | 6.1±1.2  |
